# Supplementary material for: Genetic variants of calcium and vitamin D metabolism in kidney stone disease
Source: PubMed Central journal article supplement (PMC6858460; doi:10.1038/s41467-019-13145-x), 2019-11-15
Supplement: 41467_2019_13145_MOESM2_ESM.pdf [file 41467_2019_13145_MOESM2_ESM.pdf]

**Title:** Supplementary Data 1

**Description:** Genome-wide significant SNPs in transethnic meta-analysis with likely functional consequences.

**Title:** Supplementary Data 2

**Description:** eQTL data for index SNPs at 20 genome-wide significant loci. Source: GTEx v8.
